# Supplementary material
Source: Springer Nature journal article supplement (https://www.springermedizin.de/resource/supplementary/12916_2012_717_MOESM1_ESM.pdf/9598748)

# Systemic Lupus Erythematosus

VS

Healthy controls

# Systemic Lupus Erythematosus

VS

Rheumatic disease controls

**A**

Anti-rib-P antibodies

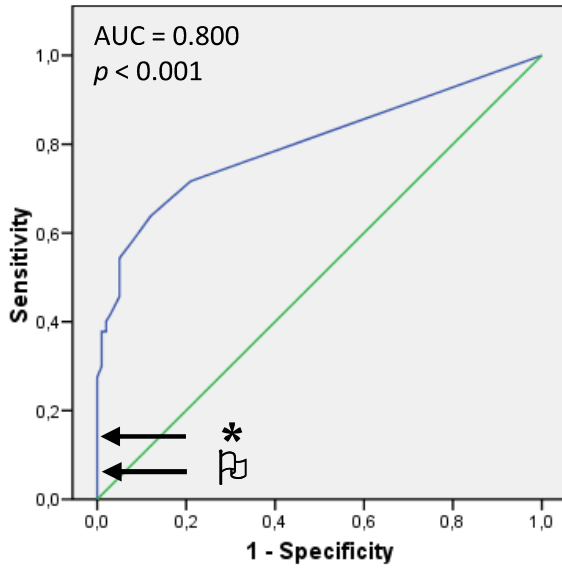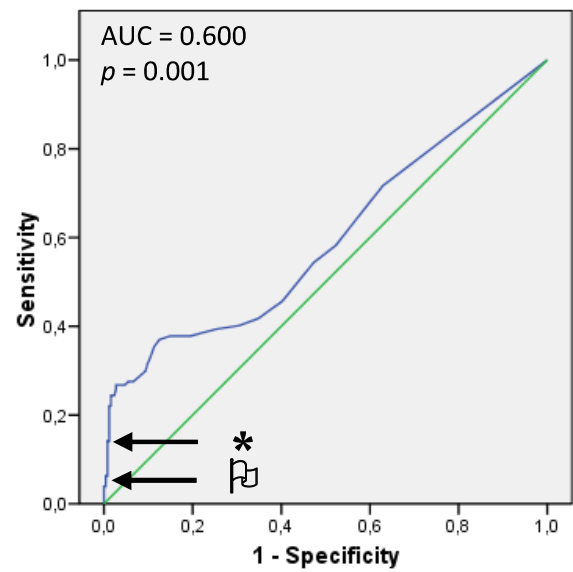

**B**

Anti-Sm antibodies

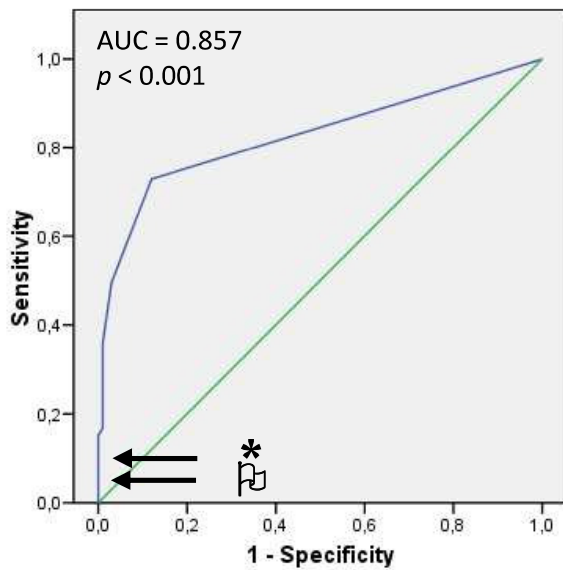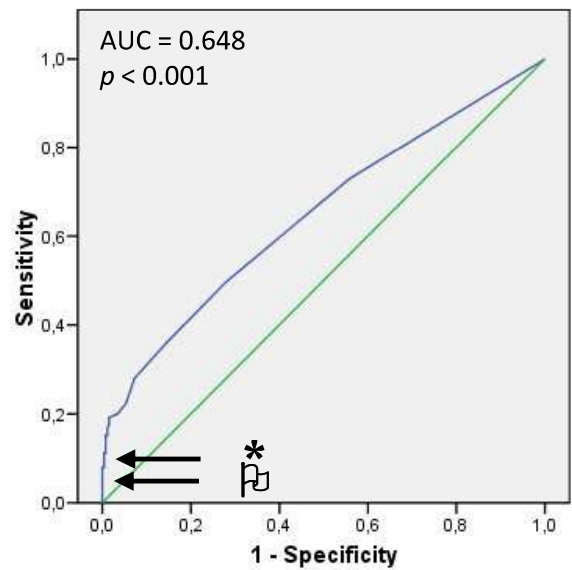

**C**

Anti-dsDNA antibodies

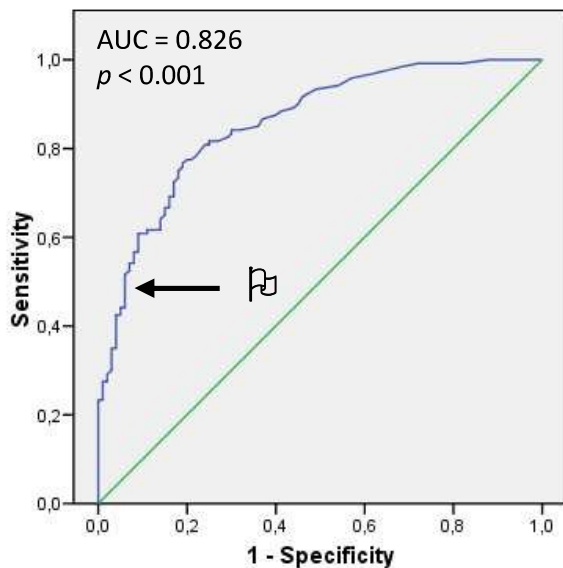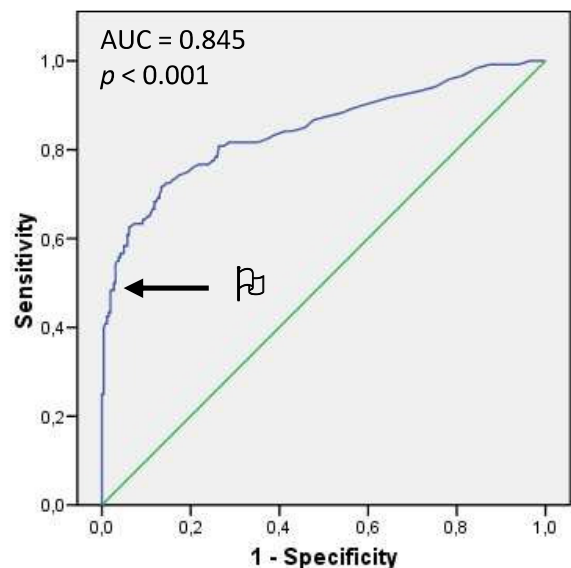

Supplement: MOESM1 [file 9598748]
